# Supplementary material for: Association between viral seasonality and meteorological factors
Source: PubMed Central journal article supplement (PMC6353886; doi:10.1038/s41598-018-37481-y), 2019-01-30

# Association between viral seasonality and meteorological factors

## Authors:

Rory Henry Macgregor Price<sup>1,2</sup>, Catriona Graham<sup>3</sup>, Sandeep Ramalingam<sup>1,2\*</sup>,

<sup>1</sup>. Department of Laboratory Medicine, Royal Infirmary of Edinburgh, UK

<sup>2</sup>. Division of Infection and Pathway Medicine, Division of Infection and Pathway Medicine, University of Edinburgh, UK

<sup>3</sup>. Wellcome Trust Clinical Research Facility, University of Edinburgh, UK

## \*Correspondence:

Dr. Sandeep Ramalingam

Consultant Virologist

Department of Laboratory Medicine

Royal Infirmary of Edinburgh

51 Little France Crescent

Edinburgh

EH16 4SA

**Email:** Sandeep.Ramalingam@nhslothian.scot.nhs.uk

Supplementary Figure 1: Generalised Linear Models for 2011.

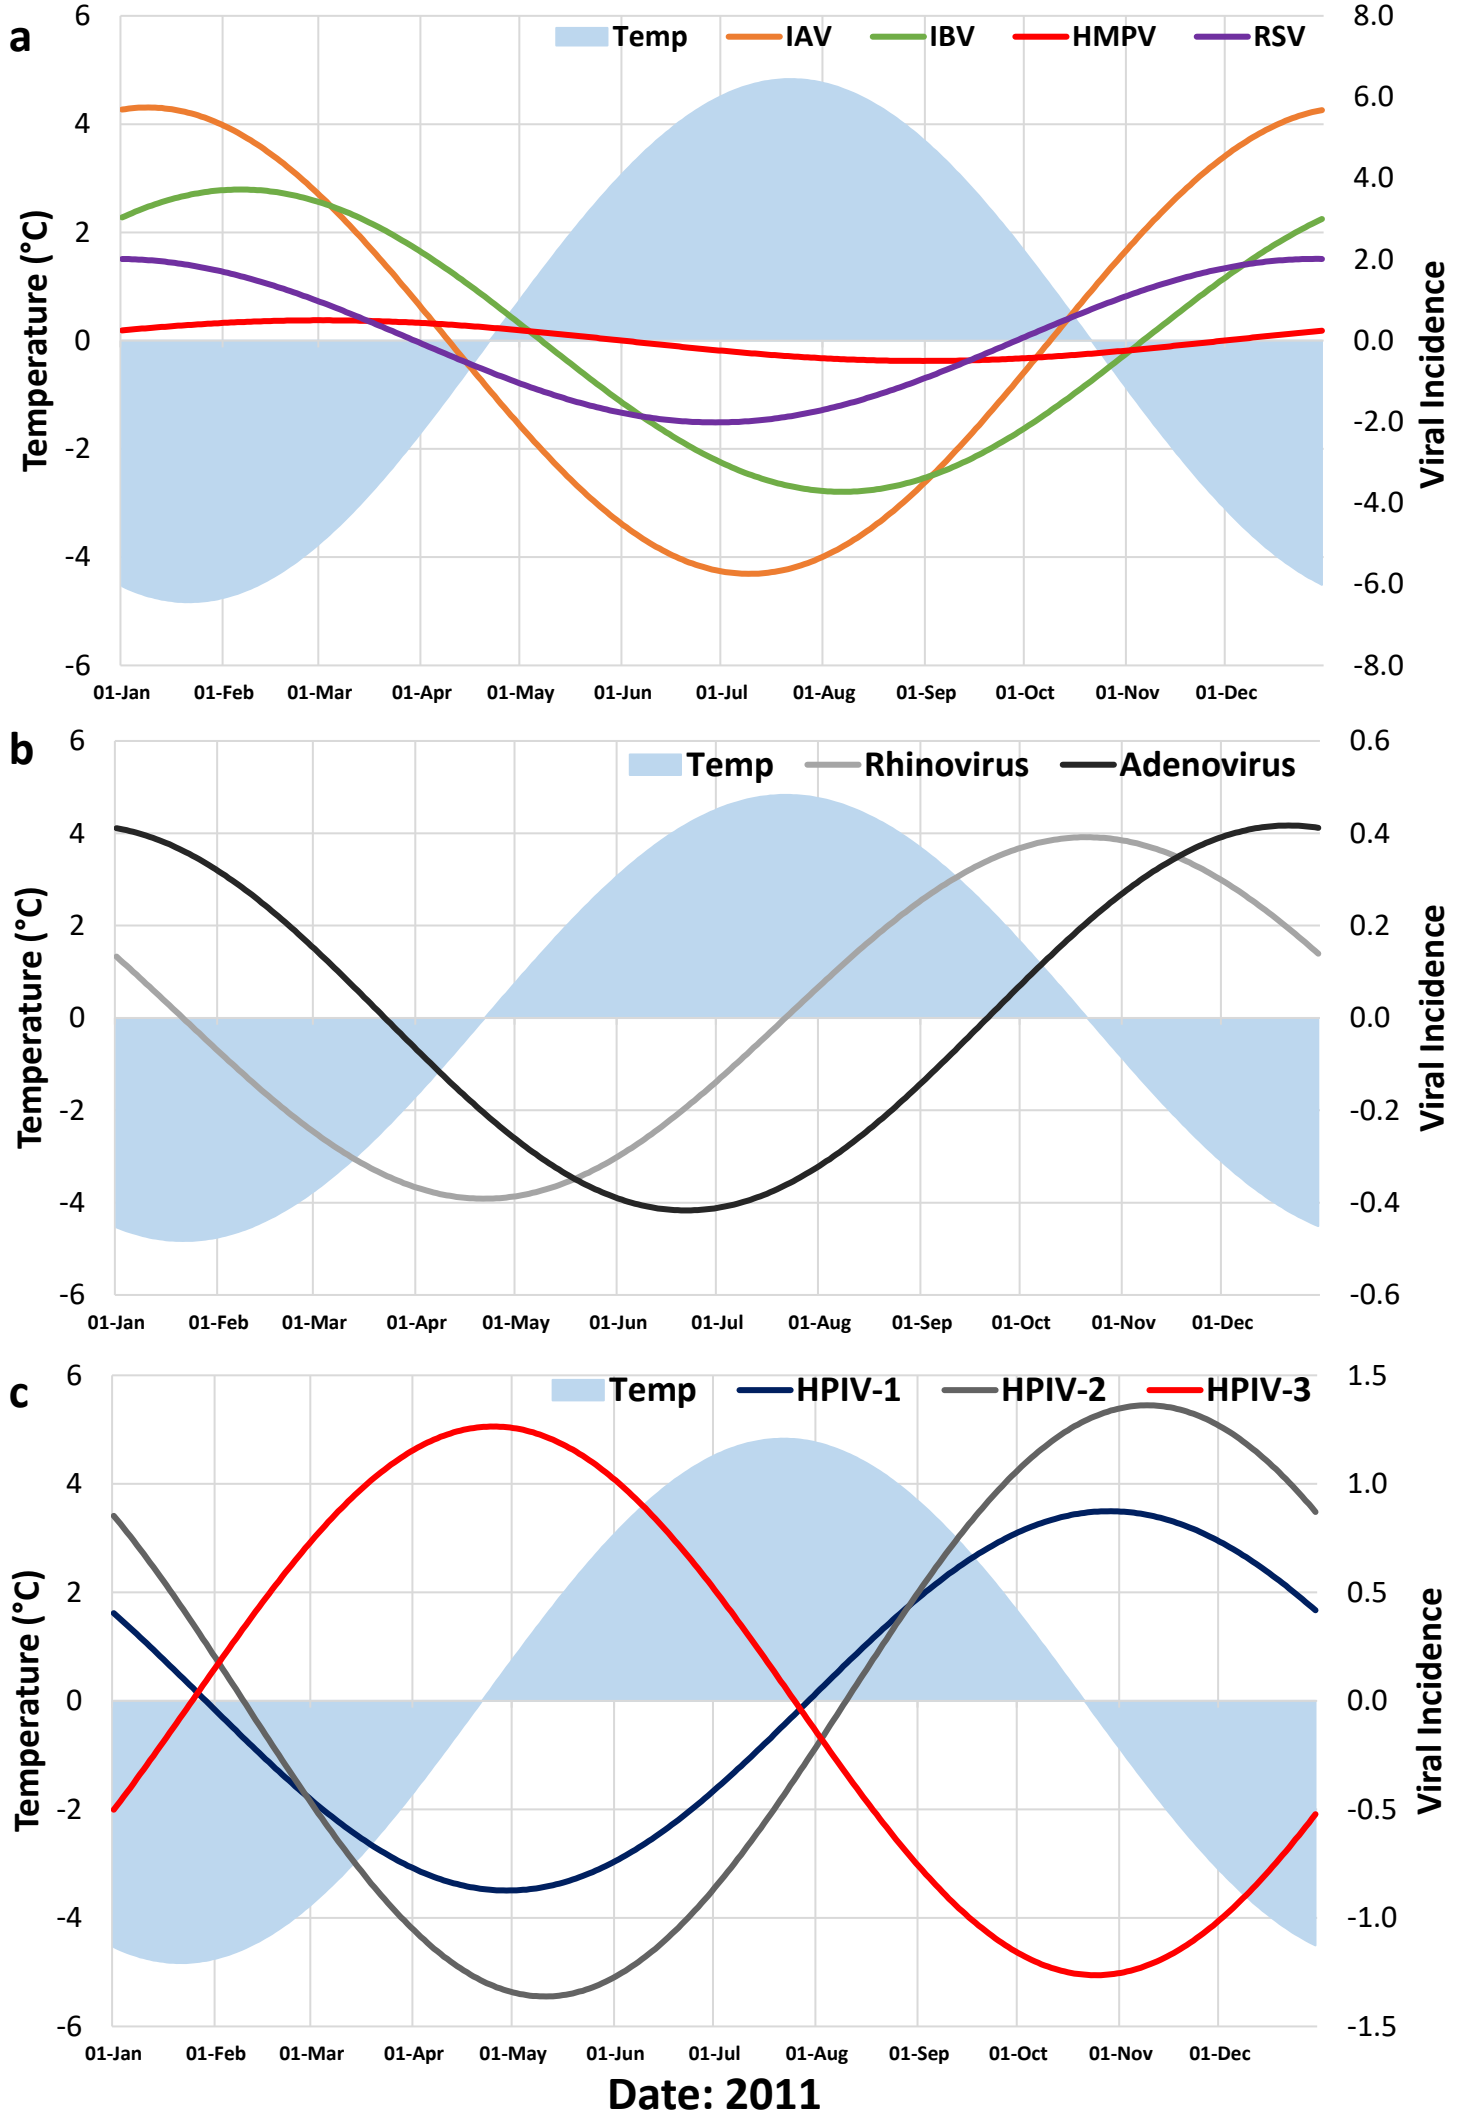

Supplement: 41598_2018_37481_MOESM1_ESM.pdf [file 41598_2018_37481_MOESM1_ESM.pdf]
